# Supplementary material for: METTL3-mediated m6A modification of KIF3C-mRNA promotes prostate cancer progression and is negatively regulated by miR-320d
Source: publisher site journal article supplement (doi:10.18632/aging.203541), 2021-09-19
Supplement: Supplementary file [file aging-v13i18-203541-supplementary-material-SD1.pdf]

## SUPPLEMENTARY FIGURES

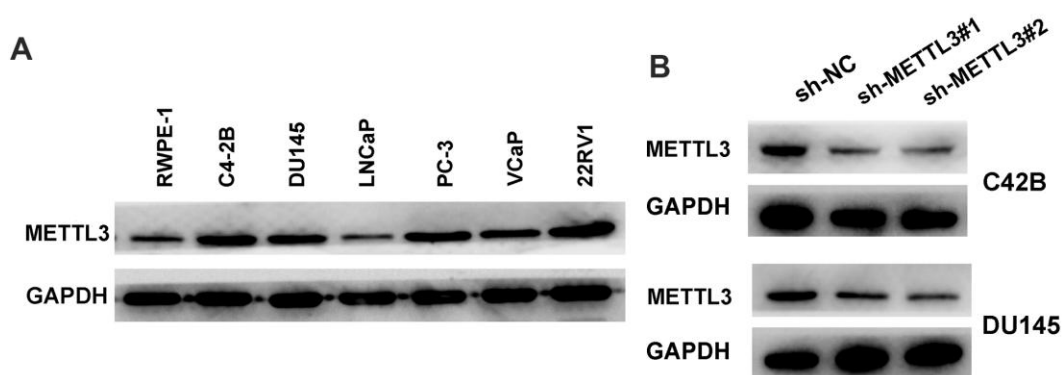

**Supplementary Figure 1.** (A) Western blotting showing METTL3 expression in PCa cell lines. (B) Western blotting showing METTL3 knockdown expression in C4-2B and DU145 cells.

### Stacked peak regions of IGF2BP1 on KIF3C:

Show 10 entries

Search:

| SiteID              | StackedRegion             | BindTranscriptNum | ClipExpNum |
|---------------------|---------------------------|-------------------|------------|
| IGF2BP1:CH000109563 | chr2:26149868-26149873[-] | 3                 | 2          |
| IGF2BP1:CH000109564 | chr2:26150278-26150319[-] | 3                 | 3          |
| IGF2BP1:CH000109565 | chr2:26150936-26150957[-] | 3                 | 3          |
| IGF2BP1:CH000109566 | chr2:26151028-26151033[-] | 3                 | 1          |
| IGF2BP1:CH000109567 | chr2:26151159-26151164[-] | 3                 | 3          |
| IGF2BP1:CH000109568 | chr2:26151327-26151328[-] | 3                 | 3          |
| IGF2BP1:CH000109569 | chr2:26151378-26151433[-] | 3                 | 1          |

**Supplementary Figure 2.** Bioinformatic analysis the KIF3C RNA binding protein IGF2BP1.
